# Supplementary material
Source: publisher figshare collection journal article supplement (https://acs.figshare.com/ndownloader/files/4434592)
Supplement: Supplementary file 1 [file 4434592]

## Supporting Information

The XRD spectra of the electrodes after an experiment are reported in the figure below.

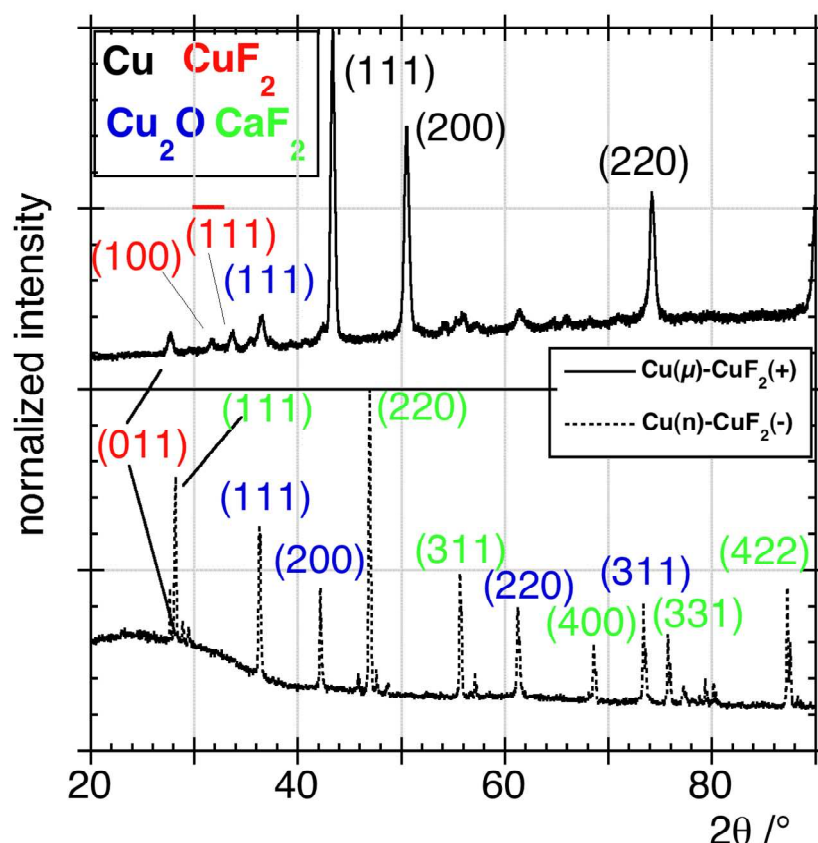

According to the different composition of the electrodes (see the Experimental Section – Cell Assembly), the lines of copper in the negative electrode are lacking since the Cu nanoparticle concentration is too low to be detected. The Cu<sub>2</sub>O features are mostly due to some reaction of CuF<sub>2</sub> with ambient moisture at room temperature. These lines are more intense in the negative electrode because this electrode was prepared with a greater amount of CuF<sub>2</sub>. The presence of the CaF<sub>2</sub> lines is due to some contamination of the CaF<sub>2</sub> powder filling the cell holder (see the Experimental Section – Cell Assembly). The electrodes carry out some CaF<sub>2</sub> powder when they are removed from the cell holder.
